# Supplementary material for: Non-uniform weighting of local motion inputs underlies dendritic computation in the fly visual system
Source: Springer Nature journal article supplement (doi:10.1038/s41598-018-23998-9), 2018-04-04
Supplement: MOESM1 [file 41598_2018_23998_MOESM1_ESM.pdf]

# Non-uniform weighting of local motion inputs underlie dendritic computation in the fly visual system

Ohad Dan<sup>1</sup>, Elizabeth Hopp<sup>3</sup>, Alexander Borst<sup>3</sup> and Idan Segev<sup>\*1,2</sup>

<sup>1</sup>Department of Neurobiology and <sup>2</sup>Edmond and Lily Safra Center for Brain Sciences, the Hebrew University of Jerusalem, Jerusalem 91904, Israel. <sup>3</sup>Department of Circuits-Computation-Models, Max-Planck-Institute of Neurobiology, Am Klopferspitz 18, 82152 Martinsried, Germany

\*Correspondence to: *idan@lobster.ls.huji.ac.il*

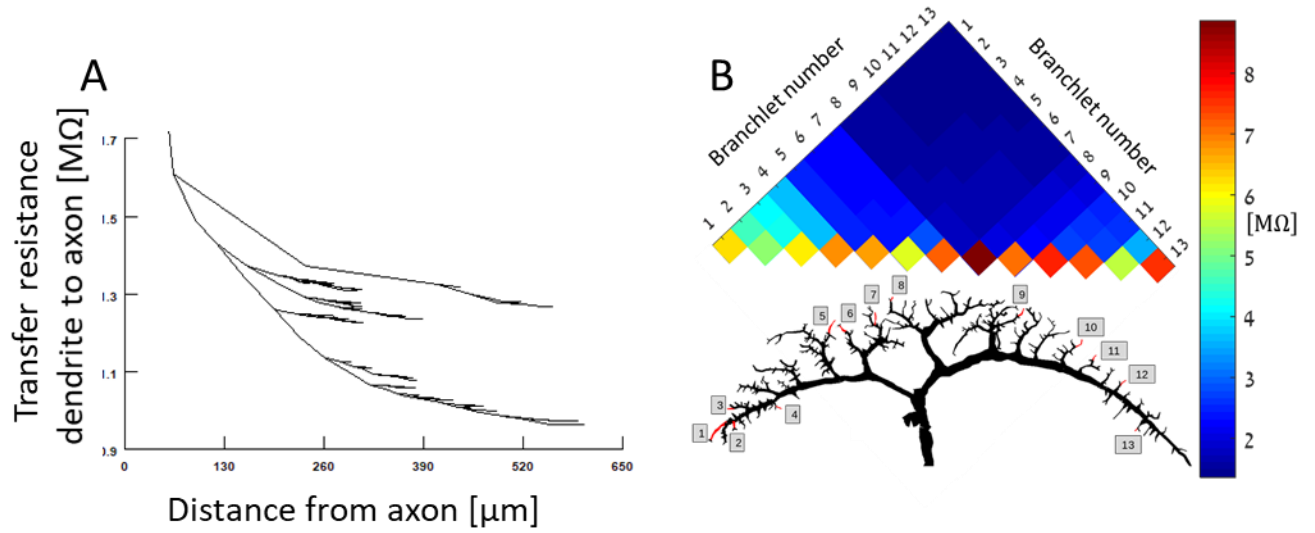

**Fig. S1. Approximation of the effect of voltage-dependent membrane ion channels.** A. Transfer resistance ( $V_{\text{axon}}/I_{\text{ded}}$ ) between each dendritic locus and the axon when the specific membrane resistivity,  $R_m$ , is reduced by a factor of 2 (to mimic the opening of voltage-dependent ion channels) as compared to Fig. 3B. The input resistance at the axon ( $V_{\text{axon}}/I_{\text{axon}}$ ) is now reduced to 2.2 MΩ. Parameters used were  $R_m = 1,000 \Omega \cdot \text{cm}^2$ ,  $R_i = 40 \Omega \cdot \text{cm}$ . B. As in Figure 4, but with the reduced  $R_m$  value as in A.
